# Supplementary material
Source: Springer Nature journal article supplement (https://www.springermedizin.de/resource/supplementary/13047_2012_465_MOESM1_ESM.pdf/9663708)

Difference APEO session 1 and session 2

10  
5  
0  
-5  
-10

0 10 20 30

Average APEO session 1 and session 2

+1.96 SD

6.85

Mean

-0.17

-1.96 SD

-7.19

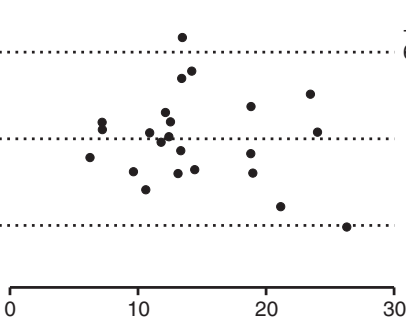

Supplement: MOESM1 [file 9663708]
